# Supplementary material
Source: PubMed Central journal article supplement (PMC3815620)
Supplement: NIHMS511536-supplement-01.pdf [file NIHMS511536-supplement-01.pdf]

**Supplemental Table 1. Baseline Characteristics of Included vs. Excluded Participants**

|                                         | <b>Included</b> | <b>Excluded</b> | <b>p-value</b> |
|-----------------------------------------|-----------------|-----------------|----------------|
| Number                                  | 1325            | 250             |                |
| Age (years) ± SD                        | 74 ± 6          | 75 ± 6          | <0.001         |
| White Race n (%)                        | 1200 (91)       | 213 (85)        | 0.01           |
| eGFR ± SD (ml/min/1.73m <sup>2</sup> )  | 75 ± 16         | 74 ± 15         | 0.4            |
| Serum Phosphorus ± SD                   | 3.2 ± 0.4       | 3.3 ± 0.5       | 0.008          |
| Urine Phosphorus/Creatinine ± SD        | 0.45 ± 0.17     | 0.45 ± 0.17     | 0.6            |
| Fractional Excretion of Phosphorus ± SD | 14 ± 6          | 15 ± 6          | 0.8            |
